# Supplementary material
Source: HighWire-hosted journal article supplement (https://bmjopenquality.bmj.com/highwire/filestream/147372/field_highwire_adjunct_files/0/bmjoq-2023-002484supp001_data_supplement.pdf)
Supplement: bmjoq-2023-002484supp001_data_supplement.pdf [file bmjoq-2023-002484supp001_data_supplement.pdf]

**Supplementary table 1** Study measures and baseline data

| Measure Type     | Indicator                                                                           | Description                                                                                                                                                         | Frequency           | Baseline data                 |
|------------------|-------------------------------------------------------------------------------------|---------------------------------------------------------------------------------------------------------------------------------------------------------------------|---------------------|-------------------------------|
| <b>Process</b>   | Compliance with MDT review on the 8 <sup>th</sup> day (%)                           | no. of currently admitted 7-day outliers documented by MDT / total no. of currently admitted patients exceeding 7 days                                              | Weekly              | 0%<br>(September 2019)        |
|                  | Early discharge planning for complex patients (%)                                   | no. of complex patients with documented preliminary discharge plan night before discharge / total no. of admitted patients indicated for early discharge planning   | Weekly              | 19.7%<br>(September 2019)     |
|                  | Patients with documented preliminary discharge order the night before discharge (%) | Total no. of patients with preliminary discharge orders the night before discharge / total no. of patients indicated for discharge                                  | Weekly              | 0%<br>(September 2019)        |
|                  | Patients discharged before 12 pm (%)                                                | no. of inpatients discharged before 12 pm / total no. of discharges                                                                                                 | Weekly              | 32%<br>(December 2019)        |
|                  | Median time till discharge                                                          | Median time (in minutes) from physician discharge order till patient physically leaving the bed                                                                     | Weekly              | 212 minutes<br>(October 2019) |
|                  | Patients admitted to hospital units before 10 am (%)                                | no. of elective admissions being admitted to hospital units before 10 am / total no. of patients scheduled for elective admission                                   | Weekly              | 19%<br>September 2021         |
|                  | Delayed admissions (lasting >45 minutes) (%)                                        | median time from patient arrival at admission office till patient admission to ward / total no. of elective admissions                                              | Weekly              | 10%<br>(September 2021)       |
|                  | Waiting time for elective admission                                                 | Median time (in hours) from patient addition on elective admission waiting list till actual admission                                                               | Weekly              | 6 days<br>(September 2021)    |
|                  | Bed turnover rate                                                                   | no. of discharges (including deaths) in a given time period / no. of beds in the hospital during same period                                                        | Weekly              | 0.57<br>(September 2019)      |
| <b>Outcome</b>   | Average hospital LOS                                                                | Total no. of discharge days / total discharges during same period                                                                                                   | Weekly              | 11.5 days<br>(January 2019)   |
|                  | ED Boarding time                                                                    | Sum of ED boarding time (in hours) of all patients admitted through ED / no. of patients who were admitted through ED during same period                            | Weekly              | 11.9 hours<br>(January 2019)  |
|                  | Patient Experience                                                                  | Data provided by Press Ganey <sup>§</sup>                                                                                                                           | Annually            |                               |
|                  |                                                                                     | Admission                                                                                                                                                           |                     | 85.1% (2019)                  |
|                  |                                                                                     | Discharge                                                                                                                                                           |                     | 83.2% (2019)                  |
| <b>Balancing</b> | Hospital readmission within 30 days                                                 | no. of discharged patients readmitted to hospital within 30 days / no. of patients discharged from hospital                                                         | Weekly<br>Quarterly | 7.5%<br>(September 2019)      |
|                  | Hospital mortality rate                                                             | Total no. of inpatient deaths (including newborns) / total number of discharges (including death and newborns) * 100                                                | Quarterly           | 2.5%<br>(September 2019)      |
|                  | Hospital-acquired infection rate                                                    | Total no. of HAI episodes in all clinical departments in a certain period / total no. of patient days for patients admitted into hospital in the same period * 1000 | Quarterly           | 1.8%<br>(September 2019)      |

<sup>§</sup> A third-party company commissioned by Ministry of Defence Health Division to acquire and analyse patient experience data. ED, emergency department; HAI, Hospital-acquired infection; LOS, length of stay; MDT, multidisciplinary team

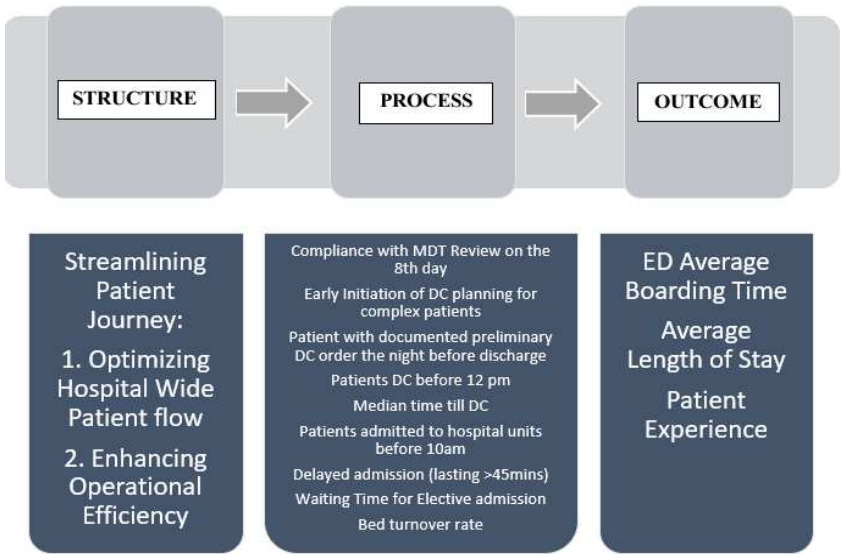

**Supplementary figure 1** Donabedian Structure-Process-Outcome (SPO) framework  
DC, discharge; ED, Emergency Department; MDT, multidisciplinary team
